# Supplementary material for: Environmental assessment of pediatric Lead exposure in Tehran; a prospective cross-sectional study
Source: BMC Public Health. 2021 Jul 21;21:1437. doi: 10.1186/s12889-021-11494-1 (PMC8296531; doi:10.1186/s12889-021-11494-1)
Supplement: Supplementary file 1 — Additional file 1. Environmental lead assessment questionnaire. [file 12889_2021_11494_MOESM1_ESM.pdf]

## Environmental lead assessment questionnaire

Dear parents/guardians, please fill the questionnaire about your child and house carefully based on the instruction gave to you. Filling this questionnaire and/or participating this study is not compulsory and you should be informed about the whole process before consenting to enroll.

|                                                                                               |                                    |
|-----------------------------------------------------------------------------------------------|------------------------------------|
| Child name:                                                                                   |                                    |
| Age:                                                                                          |                                    |
| Gender:                                                                                       |                                    |
| Weight:                                                                                       | height:                            |
| Residence duration at the building:                                                           |                                    |
| Recent building reconstruction (last six months):    yes                      no              |                                    |
| Recent building painting (last six months) :            yes                      no           |                                    |
| Building age:                                                                                 |                                    |
| Building painting type:                                                                       |                                    |
| water pipe material:                                                                          |                                    |
| water pipe age:                                                                               |                                    |
| Building tap material:                                                                        |                                    |
| Building tap age:                                                                             |                                    |
| Living district name:                                                                         | Living district municipality name: |
| Are you living in an industrial area?                      If yes, what is the industry?      |                                    |
| What is the material for child's usual toys?                                                  |                                    |
| Father's job:                                                                                 |                                    |
| Mother's job:                                                                                 |                                    |
| Does the child have babysitter at house?                      If yes what is her another job? |                                    |

|                                                                                                                                                  |
|--------------------------------------------------------------------------------------------------------------------------------------------------|
| Does anyone living at your house is addicted to drugs? If yes please name his/her kinship, drug type, addiction duration, and consumption route. |
| Pica habit ( eating unusuals and weirds like ice, dust, chalk and etc):                                                                          |
| History of food allergy: yes                      no                                                                                             |
| Attention deficit: yes      no    hyperactivity disorder: yes    no    restlessness: yes    no                                                   |
| Spice type used:    bulk-sale                      hygiene packaging                                                                             |
| The most frequently used spice:                                                                                                                  |
| Spice consumption in each month:                                                                                                                 |
| History of lead poisoning in family: yes                      no                                                                                 |
| Eating habit disorders:    yes                      no                                                                                           |
| Abdominal pain:                      if yes, duration:                                                                                           |
| Constipation:                      if yes, duration:                                                                                             |

Name:

date and sign:
